# Supplementary material for: Calpastatin phosphorylation regulates radiation-induced calpain activity in glioblastoma
Source: PubMed Central journal article supplement (PMC5865692; doi:10.18632/oncotarget.24523), 2018-02-19
Supplement: oncotarget-09-14597-s001.pdf [file oncotarget-09-14597-s001.pdf]

# Calpastatin phosphorylation regulates radiation-induced calpain activity in glioblastoma

## SUPPLEMENTARY MATERIALS

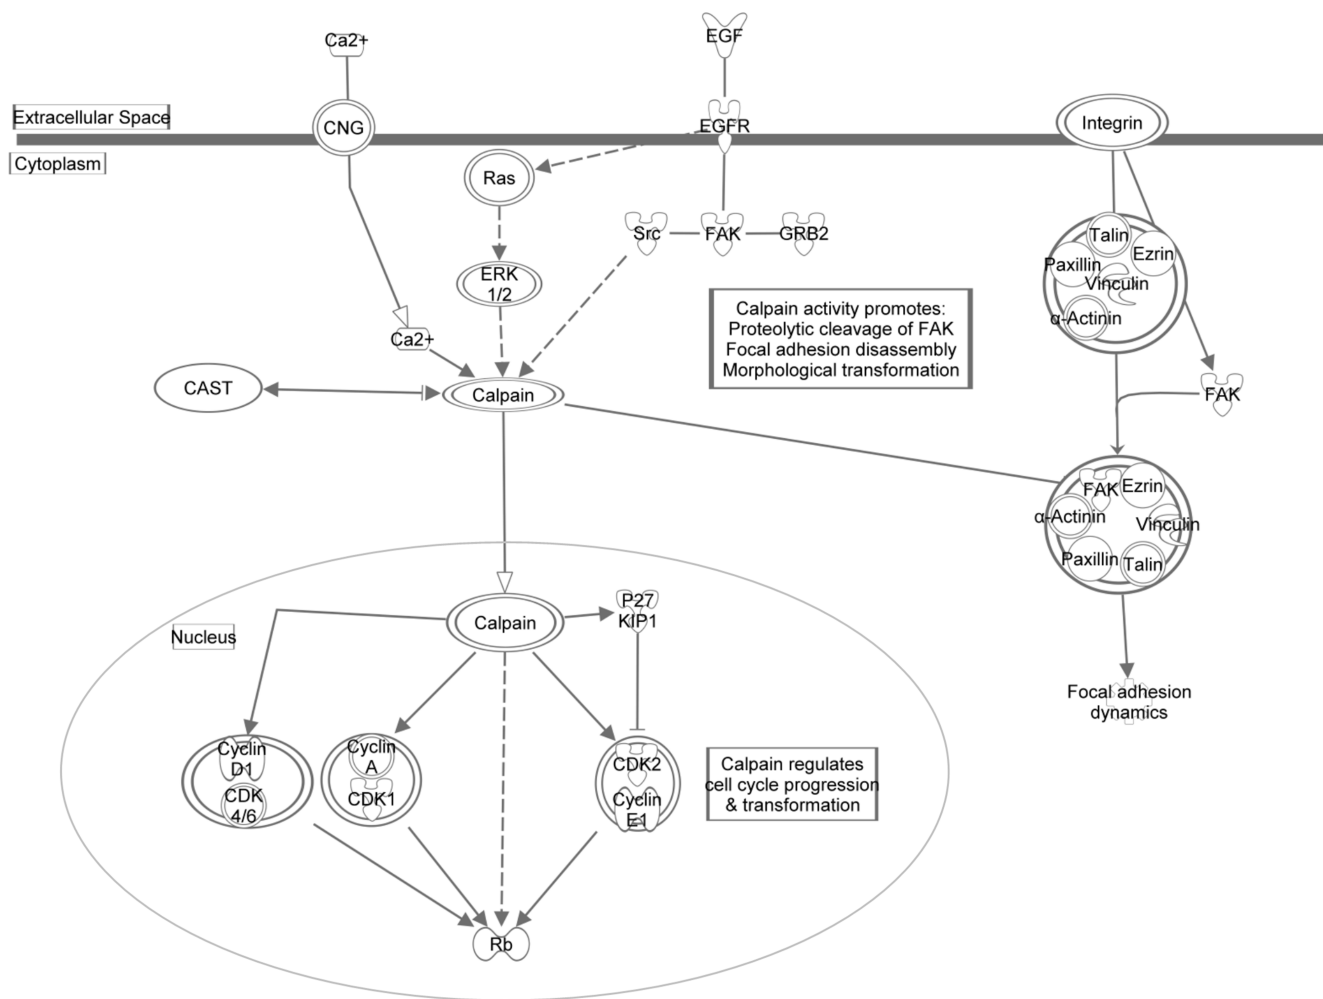

Supplementary Figure 1: Calpain signaling pathway generated from Ingenuity Pathway Analysis depicting select targets of calpain. CAST = Calpastatin.

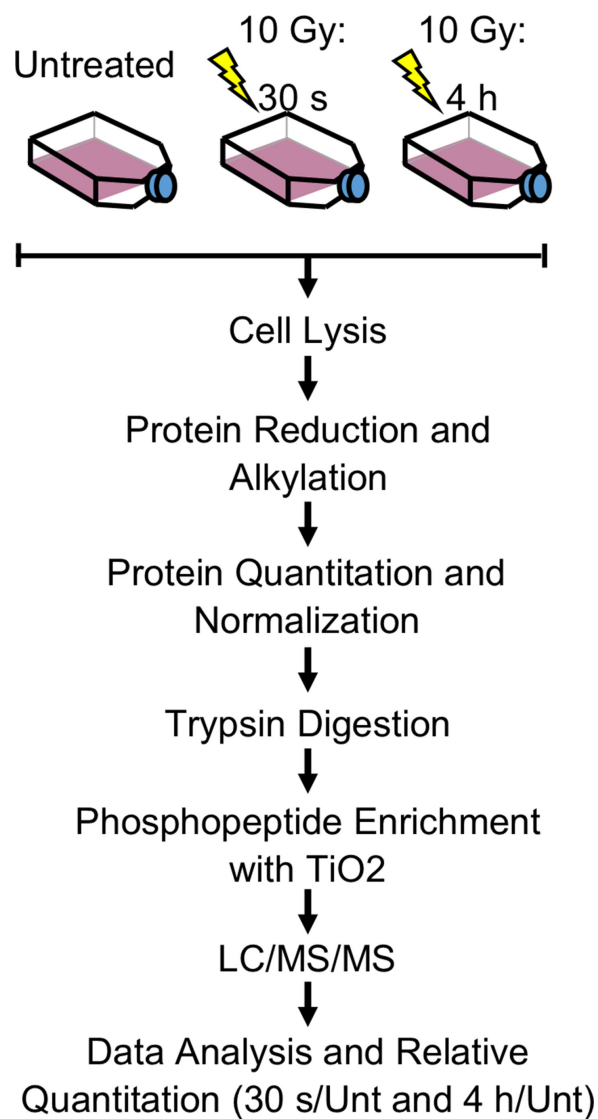

**Supplementary Figure 2: Experimental scheme of the radiation treatments and sample preparation for phosphoproteomic profiling.**

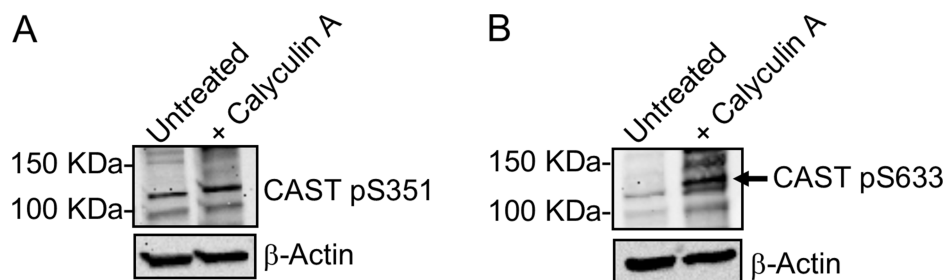

**Supplementary Figure 3: Western blot validation of phospho-specific calpastatin antibodies.** U87 cells were treated with the phosphatase inhibitor calyculin A to enrich for phosphorylated calpastatin. (A) No band specific for phosphorylated calpastatin was detected using calpastatin-pS351 antibody. (B) The calpastatin-pS633 antibody shows a distinct band at 120 KDa in cells treated with calyculin A. CAST = calpastatin.

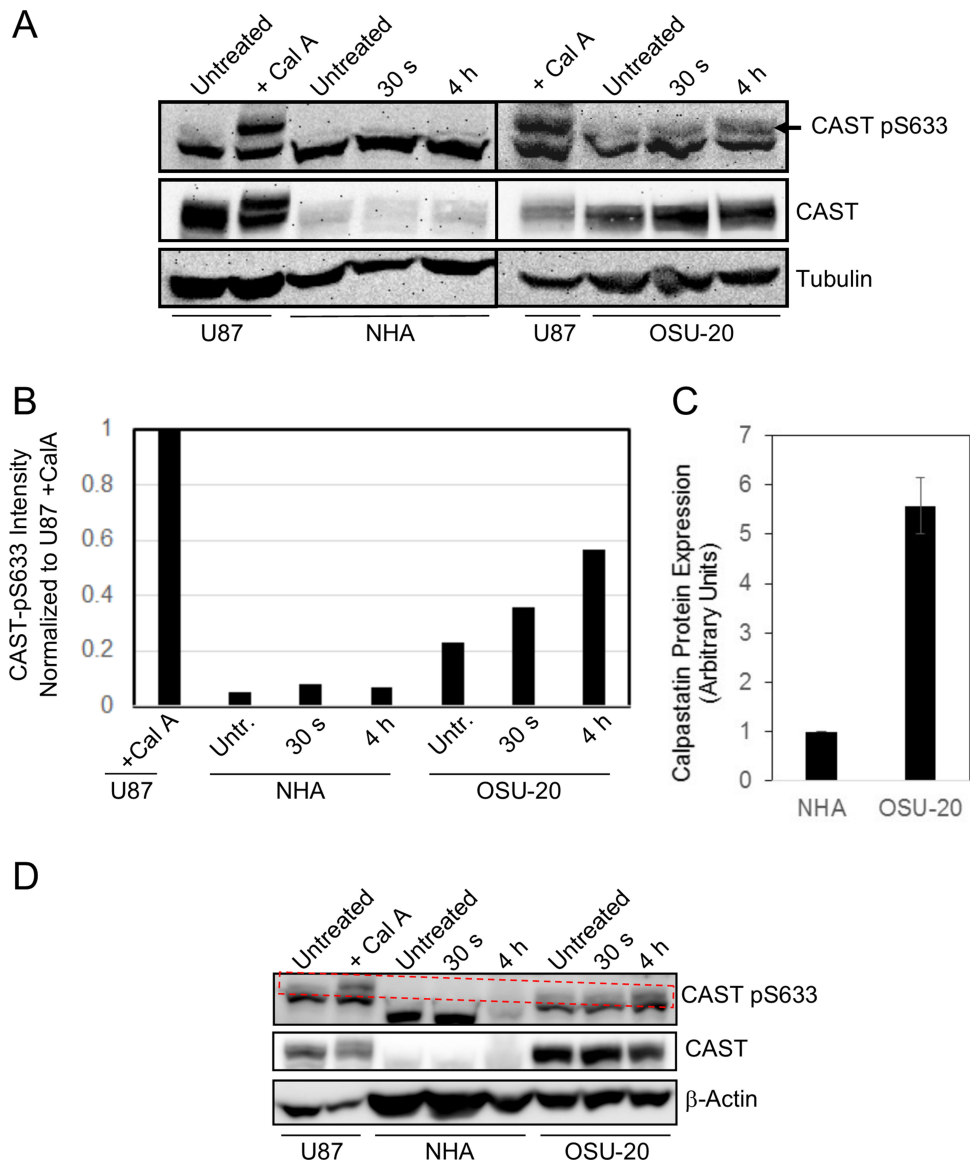

**Supplementary Figure 4: Radiation-induced phosphorylation of calpastatin in GSCs.** (A) The western blot shown in figure 2C was repeated with biological replicates to validate the result. (B) Quantitation of phospho-calpastatin from the western blot in (A). Calpastatin-pS633 levels in NHA and OSU-20 were normalized to Calpastatin-pS633 levels in the U87 +CalA positive control on each blot, since the two cell lines were analyzed on different western blots. (C) Quantitation of total calpastatin protein levels in untreated NHA and OSU-20 cells from the blot in Figure 2C. (D) Western blot in which twice as much protein lysate was loaded for NHA samples relative to OSU-20. The red box is used to distinguish the phospho-calpastatin band at 120 KDa from non-specific bands. CAST = calpastatin.

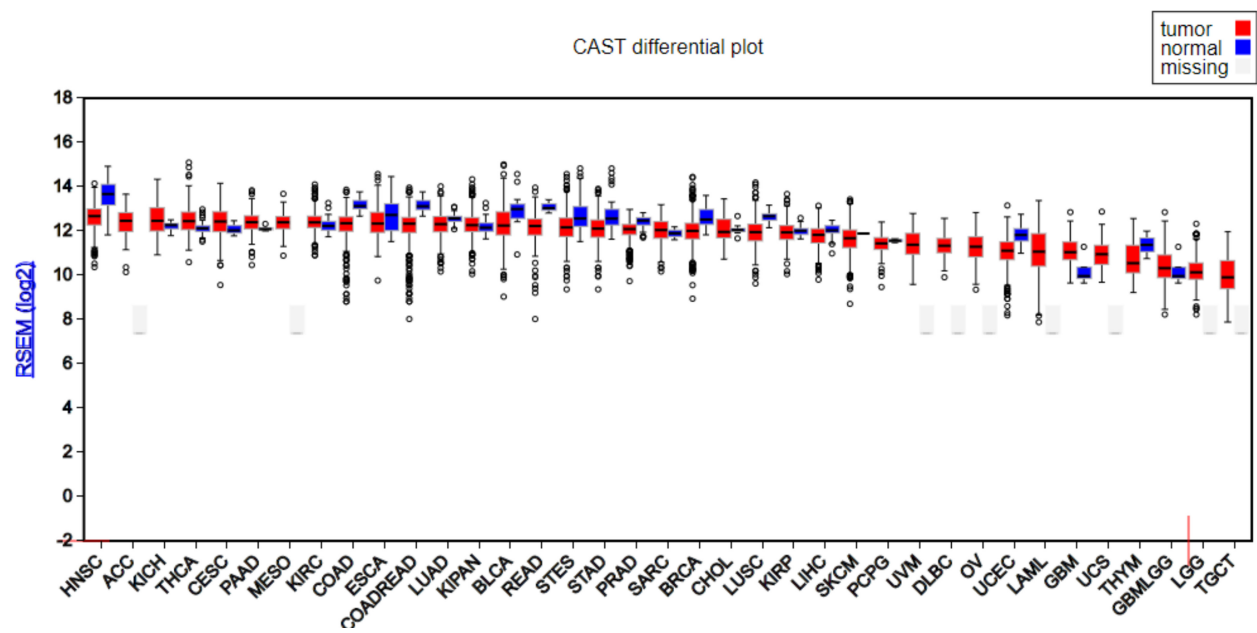

Supplementary Figure 5: CAST (calpastatin) gene expression across cancers in tumor versus normal tissue. Generated from TCGA data with the expression profile tool at firebrowse.org.

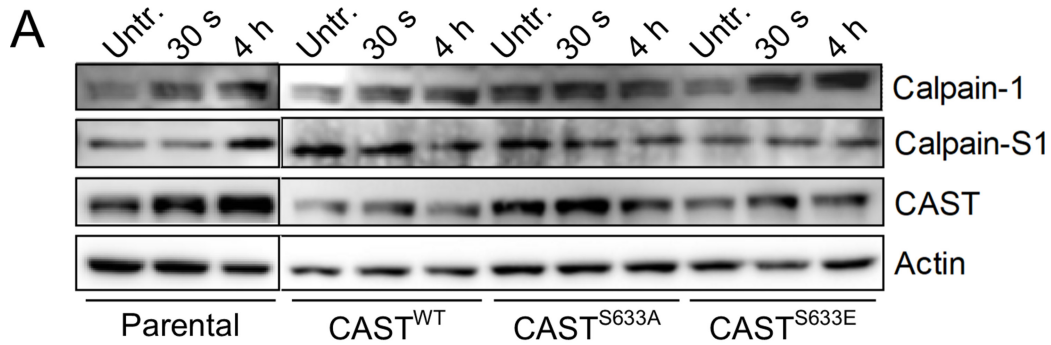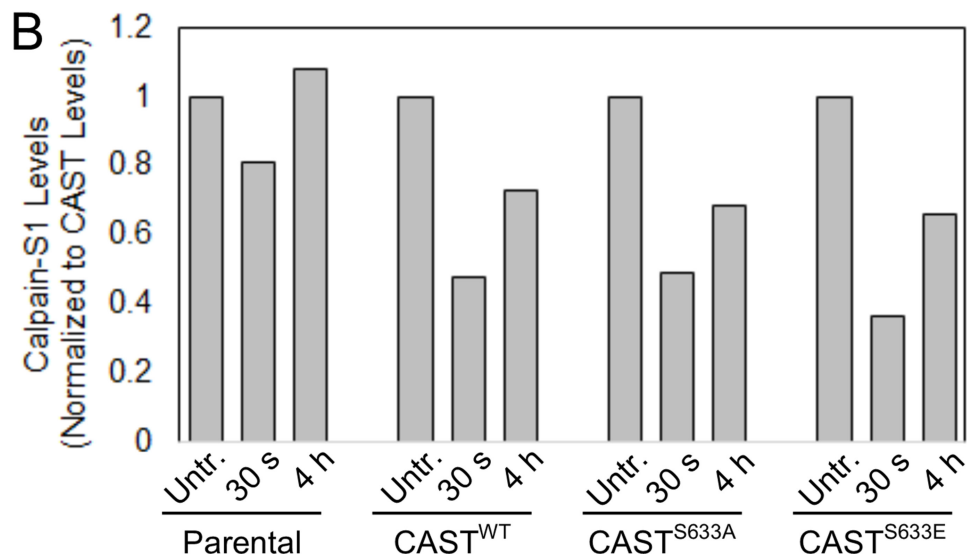

**Supplementary Figure 6: Mutation of calpastatin serine 633 affects calpain-1 levels but not calpain-S1 levels following radiation treatment.** (A) The western blot in figure 3 was repeated with biological replicates to validate the results, and to assess levels of the regulatory subunit calpain-S1. Calpain-1, calpain-S1, and calpastatin levels were assessed in LN18 parental or stable cell lines expressing calpastatin<sup>WT</sup>, calpastatin<sup>S655A</sup> (non-phosphorylatable mutant), or calpastatin<sup>S655E</sup> (phospho-mimetic mutant). (B) Quantitation of calpains-S1 levels from the western blot in (A), normalized to total calpastatin levels. CAST = calpastatin.

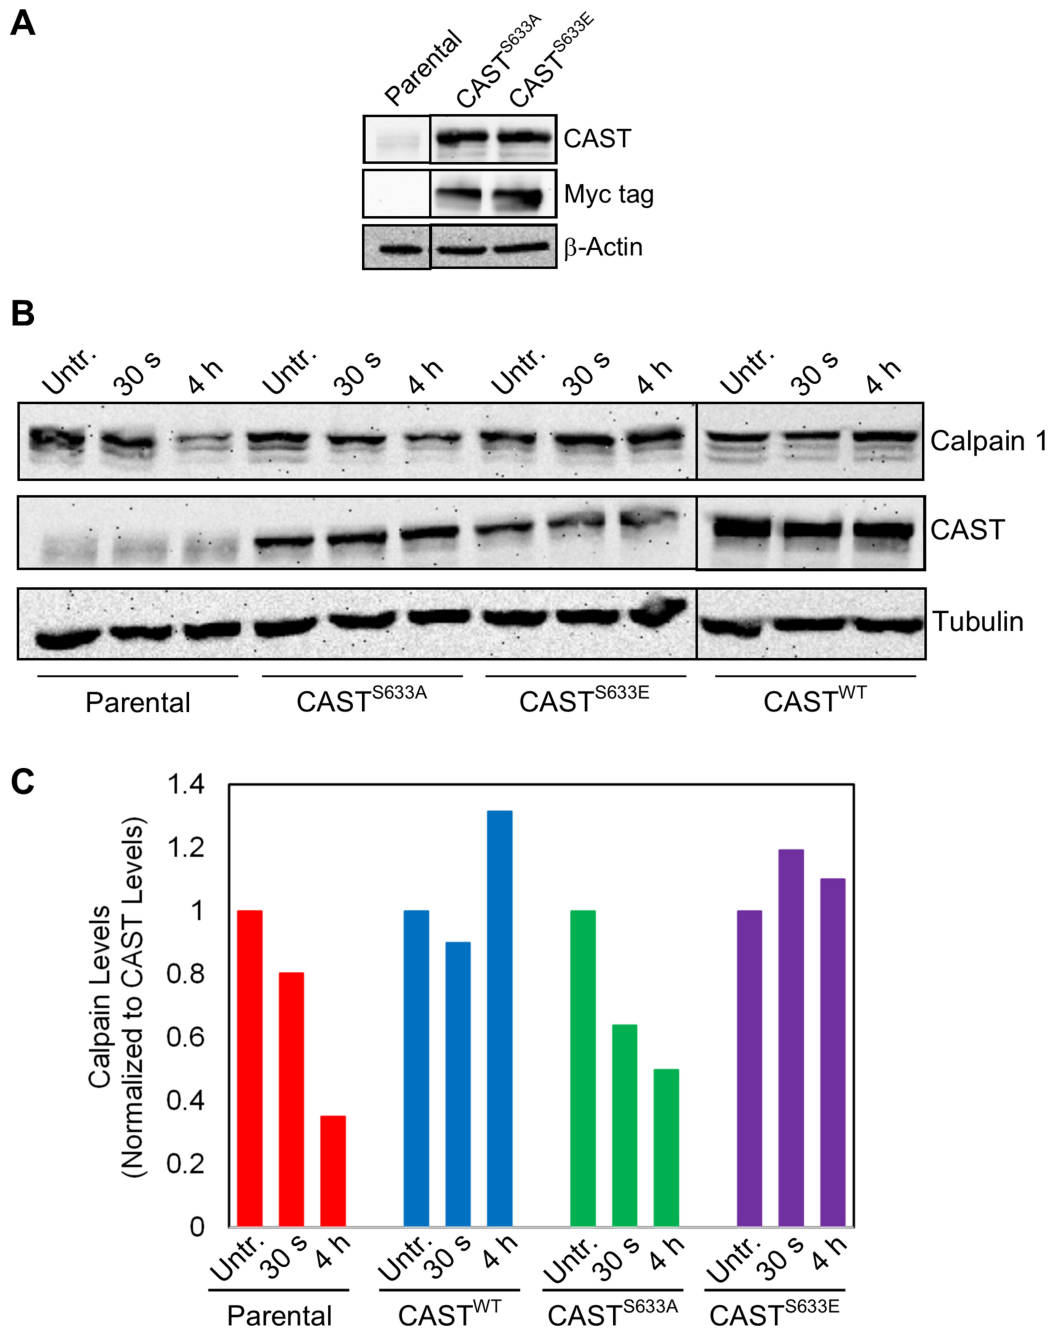

**Supplementary Figure 7: Functional analysis of calpastatin phosphorylation by site-directed mutagenesis of calpastatin in U87 cells.** (A) Stable cell lines expressing calpastatin<sup>S655A</sup> (non-phosphorylatable mutant), or calpastatin<sup>S655E</sup> (phospho-mimetic mutant) were generated in U87 cells. (B) Western blot of calpain-1 levels following radiation treatment in each of the calpastatin stable cell lines and parental LN18. (C) Quantitation of calpain-1 levels from the western blot from (B), normalized to total calpastatin. CAST = calpastatin.

**Supplementary Table 1: References reporting radiation-induced phosphorylation of MDC1, TP53BP1, and TRIM28 at specific residues**

| Protein | Phospho-peptide          | Phospho-site | Reference for radiation-induced phosphorylation of phospho-site |
|---------|--------------------------|--------------|-----------------------------------------------------------------|
| MDC1    | QDG[S]QEAPLSELEPFHPKPK   | S1086        | Stokes et al, 2007                                              |
| TP53BP1 | SGTAETEPVEQDS[S]QPSLPLVR | S831         | Jowsey et al, 2007                                              |
| TRIM28  | [S]GEGEVSGLMR            | S473         | Blasius et al, 2011                                             |

**Supplementary Table 2: Validation of phospho-proteomic profiling with proteins known to be phosphorylated post-radiation**

| 30 s Time-point | MDC1  | TP53BP1 | TRIM28 |
|-----------------|-------|---------|--------|
| OSU-2           | 5.8   | 2.5*    | 0.9    |
| OSU-11          | 16.0* | 2.7*    | 1.2    |
| OSU-20          | 7.2*  | 3.2*    | 1.1    |
| U87             | 2.4   | 2.9*    | 0.7    |
| 4 h Time-point  | MDC1  | TP53BP1 | TRIM28 |
| OSU-2           | 5.9   | 1.8*    | 2.0*   |
| OSU-11          | 6.9*  | 2.1*    | 4.9*   |
| OSU-20          | 6.3*  | 1.9     | 2.4*   |
| U87             | 2.1   | 2.6*    | 1.7*   |

Radiation-induced fold changes in phosphorylation calculated from the MS data are shown for each of the phospho-peptides in from Supplementary Table 1 across four cell lines at both time-points. The asterisk indicates a *p*-value <0.05 calculated from biological triplicates.

**Supplementary Table 3: Post-radiation fold changes in calpastatin phosphorylation at serines 351 and 633 in OSU-53 GSCs**

| Calpastatin Phospho-peptide       | Phosphosite | Post-RT Time-point | OSU-53 |
|-----------------------------------|-------------|--------------------|--------|
| KPADDQDPIDAL[S]GDLDSCPSTTETSQNTAK | S633        | 30 s               | 1.3    |
| KPADDQDPIDAL[S]GDLDSCPSTTETSQNTAK | S633        | 4 h                | 3.8*   |
| SESELIDEL[S]JEDFDR                | S351        | 30 s               | 5.7    |
| SESELIDEL[S]JEDFDR                | S351        | 4 h                | 10.3*  |

Fold changes were calculated for each time-point (30 s/Untreated and 4 h/Untreated) from triplicate intensity values from mass spectrometry data.
